# Supplementary material
Source: PubMed Central journal article supplement (PMC2753475)
Supplement: NIHMS134314-supplement-Supplemental_Fig_legends.pdf [file NIHMS134314-supplement-Supplemental_Fig_legends.pdf]

**Fig. S1. The expression level of Lgl and pLgl in the wild type, Lgl- and Lgl-3A-overexpressing ovaries.** (A) Western blot analyses with the anti-Lgl, anti-pLgl and anti- $\alpha$ -Tubulin antibodies (loading control), indicating the levels of Lgl and pLgl in the wild-type (*mat-Gal4* driver only), Lgl-overexpressing and Lgl-3A-overexpressing ovaries. (B) Comparison of the relative levels of pLgl and Lgl in the wild-type, Lgl-overexpressing and Lgl-3A-overexpressing ovaries. Values were means of the three independent experiments, which were normalized with the amounts of  $\alpha$ -Tubulin. The Lgl and pLgl levels in the wild type were set to 1.

**Fig. S2. Stau was partially mislocalized in stage 9 egg chambers with Lgl overexpression.** In stage 9 egg chambers with Lgl-3A overexpression, Stau was frequently mislocalized to the center of the oocyte.

**Fig. S3. *bcd* mRNA in wild-type egg chambers.** There is disc-shaped localization in the oocyte anterior (A), but in Lgl-3A overexpression *bcd* sometimes localized at the posterior of the oocyte.

**Fig. S4. Lgl localization.** Lgl was localized at the cortex when Lgl-3A was co-overexpressed with aPKC <sup>$\Delta$ N</sup>-GFP in the egg chambers with the driver *Mat-Gal4*.
