# Supplementary material
Source: PubMed Central journal article supplement (PMC2753475)

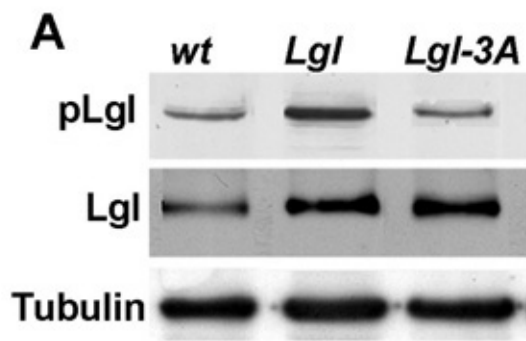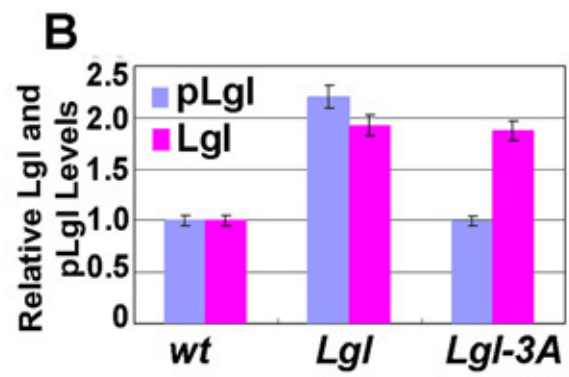

Supplement: NIHMS134314-supplement-Fig_S1.pdf [file NIHMS134314-supplement-Fig_S1.pdf]

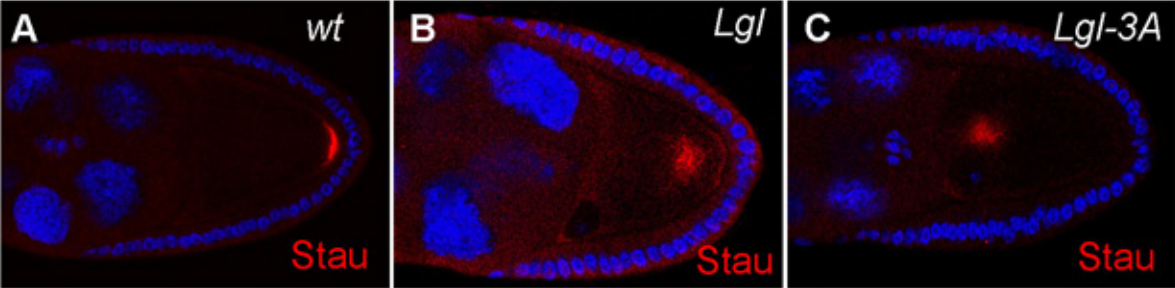

Supplement: NIHMS134314-supplement-Fig_S2.pdf [file NIHMS134314-supplement-Fig_S2.pdf]

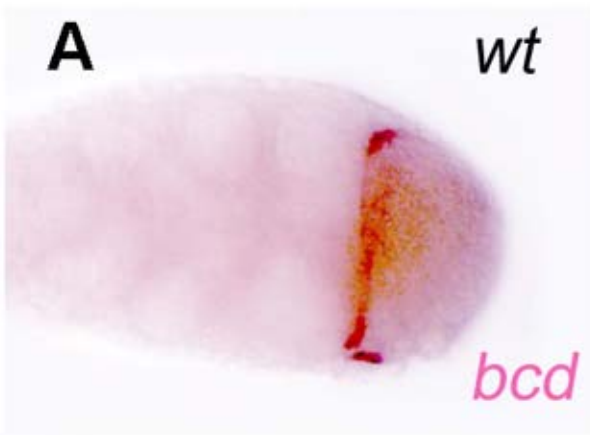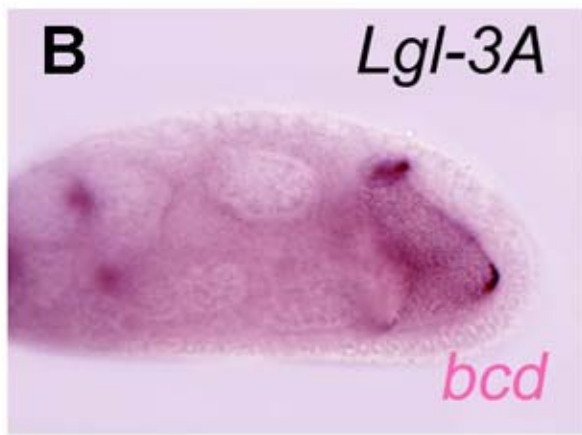

Supplement: NIHMS134314-supplement-Fig_S3.pdf [file NIHMS134314-supplement-Fig_S3.pdf]

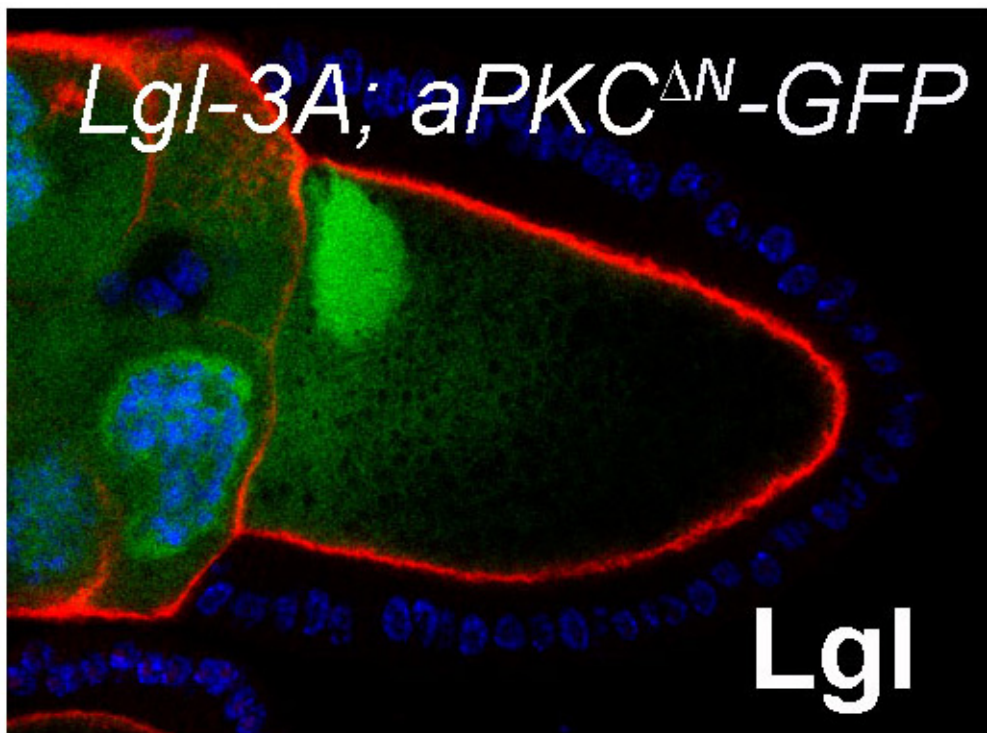

Supplement: NIHMS134314-supplement-Fig_S4.pdf [file NIHMS134314-supplement-Fig_S4.pdf]
